# Supplementary material for: The Paris System for Reporting Urinary Cytology: A Meta-Analysis
Source: MDPI journal article supplement (doi:10.3390/jpm12020170), 2022-01-27
Supplement: s1 [file s1]

**Table S1.** Risk of Bias of the studies included in the meta-analysis, according to the Quality Assessment of Diagnostic Accuracy Studies 2 (QUADAS-2).

| First Author/<br>Reference | Patient Selection | Index Test | Reference Standard | Flow and Timing |
|----------------------------|-------------------|------------|--------------------|-----------------|
| Abro [1]                   | H                 | L          | U                  | H               |
| McIntire [2]               | H                 | L          | U                  | H               |
| Danakas [3]                | L                 | L          | U                  | L               |
| Nguyen [4]                 | L                 | L          | U                  | L               |
| Koh [5]                    | L                 | L          | U                  | L               |
| Anbardar [6]               | H                 | L          | U                  | L               |
| Kuan [7]                   | H                 | L          | U                  | L               |
| de Paula [8]               | L                 | L          | U                  | L               |
| Moulavasilis [9]           | H                 | L          | U                  | L               |
| Vallamredy [10]            | L                 | L          | U                  | L               |
| Stanzione [11]             | L                 | L          | U                  | L               |
| Rai [12]                   | L                 | L          | U                  | L               |
| Mikou [13]                 | L                 | L          | U                  | L               |
| Chan [14]                  | L                 | L          | U                  | L               |
| Meilleroux [15]            | U                 | L          | U                  | L               |

|               |   |   |   |   |
|---------------|---|---|---|---|
| Zare [16]     | L | L | U | L |
| Rohilla [17]  | L | L | U | L |
| Xing [18]     | H | L | U | L |
| Roy [19]      | L | L | U | L |
| Zheng [20]    | H | L | U | L |
| Malviya [21]  | L | L | U | L |
| Suh [22]      | H | L | U | L |
| Wang [23]     | L | L | U | L |
| Toyonaga [24] | L | U | U | L |
| Granados [25] | L | L | U | L |
| Hassan [26]   | L | L | U | L |
| Miki [27]     | H | L | U | L |
| Joudi [28]    | H | L | U | H |

Abbreviations: L, low; U, unclear; H, high

**Table S2.** Pooled risk of high-grade malignancy (ROHM) associated with each of the Paris System categories. Subgroup analysis of the studies using solely liquid-based cytology (LBC).

| Paris System Categories | No of Studies Pooled | ROHM (%) | 95% CI           | tau <sup>2</sup> | Q      | I <sup>2</sup> (%) |
|-------------------------|----------------------|----------|------------------|------------------|--------|--------------------|
| Nondiagnostic           | 5                    | 6.41     | [0.0181; 0.2035] | 0.7028           | 8.06   | 53.6               |
| NHGUC                   | 12                   | 12.82    | [0.0739; 0.2133] | 0.9657           | 328.09 | 93.9               |

|                                    |    |              |                  |        |       |      |
|------------------------------------|----|--------------|------------------|--------|-------|------|
| <b>AUC</b>                         | 11 | <b>40.48</b> | [0.2849; 0.5373] | 0.5994 | 58.06 | 76.3 |
| <b>LGUN</b>                        | 4  | <b>11.43</b> | [0.0436; 0.2677] | 0      | 0.17  | 0.0  |
| <b>SHGUC</b>                       | 13 | <b>77.49</b> | [0.6728; 0.8521] | 0.5153 | 35.91 | 75.9 |
| <b>HGUC and other malignancies</b> | 12 | <b>90.26</b> | [0.8513; 0.9375] | 0.2471 | 15.92 | 50.1 |

Abbreviations: CI, confidence interval; NHGUC, negative for high-grade urothelial carcinoma; AUC, atypical urothelial cells; LGUC, low-grade urothelial neoplasm; SHGUC, suspicious for high-grade urothelial carcinoma; HGUC, high-grade urothelial carcinoma

**Table S3.** Pooled risk of high-grade malignancy (ROHM) associated with each of the Paris System categories. Subgroup analysis of the studies using solely conventional cytology.

| <b>Paris System Categories</b>     | <b>No of Studies Pooled</b> | <b>ROHM (%)</b> | <b>95% CI</b>    | <b>tau<sup>2</sup></b> | <b>Q</b> | <b>I<sup>2</sup> (%)</b> |
|------------------------------------|-----------------------------|-----------------|------------------|------------------------|----------|--------------------------|
| <b>Nondiagnostic</b>               | 6                           | <b>50.00</b>    | [0.3228; 0.6772] | 0                      | 0.35     | 0.0                      |
| <b>NHGUC</b>                       | 9                           | <b>13.41</b>    | [0.0955; 0.1851] | 0.0517                 | 6.52     | 16.6                     |
| <b>AUC</b>                         | 9                           | <b>30.67</b>    | [0.1790; 0.4729] | 0.6567                 | 23.01    | 70.6                     |
| <b>LGUN</b>                        | 6                           | <b>14.77</b>    | [0.0320; 0.4759] | 1.6611                 | 3.00     | 62.9                     |
| <b>SHGUC</b>                       | 10                          | <b>74.06</b>    | [0.6938; 0.7825] | 0                      | 11.28    | 0.0                      |
| <b>HGUC and other malignancies</b> | 10                          | <b>91.82</b>    | [0.8145; 0.9663] | 1.3831                 | 54.25    | 88.3                     |

Abbreviations: CI, confidence interval; NHGUC, negative for high-grade urothelial carcinoma; AUC, atypical urothelial cells; LGUC, low-grade urothelial neoplasm; SHGUC, suspicious for high-grade urothelial carcinoma; HGUC, high-grade urothelial carcinoma

## References

1. Abro, S.; Nomani, L.; Wojcik, E.M.; Pambuccian, S.E.; Chatt, G.; Barkan, G.A. Outcome Analysis and Negative Predictive Value of the “Unsatisfactory/nondiagnostic” Category of The Paris System for Reporting Urinary Cytology. *J. Am. Soc. Cytopathol.* **2021**, *10*, 64–70.
2. McIntire, P.J.; Kilic, I.; Pambuccian, S.E.; Wojcik, E.M.; Barkan, G.A. The Paris System for Reporting Urinary Cytology Reduces Atypia Rates and Does Not Alter the Negative Predictive Value of Urine Cytology. *J. Am. Soc. Cytopathol.* **2021**, *10*, 14–19.
3. Danakas, A.; Sweeney, M.; Cheris, S.; Agrawal, T. Urinary Tract Cytology: A Cytologic-Histopathologic Correlation with The Paris System, an Institutional Study. *J. Am. Soc. Cytopathol.* **2021**, *10*, 56–63.
4. Nguyen, L.; Nilforoushan, N.; Krane, J.F.; Bose, S.; Bakkar, R. Should “Suspicious for High-Grade Urothelial Carcinoma” and “Positive for High-Grade Urothelial Carcinoma” Remain Separate Categories? *Cancer Cytopathol.* **2020**. doi:10.1002/cncy.22357.
5. Koh, H.H.; Lee, M.J.; Park, N.J.; Kim, H.-S.; Oh, Y.L. Impact of Implementing the Paris System for Reporting Urinary Cytology: A Single-Institutional Experience With Emphasis on Diagnostic Yield of High-Grade Urothelial Carcinoma and Low-Grade Urothelial Neoplasm. *Anticancer. Res.* **2020**, *40*, 3477–3484.
6. Anbardar, M.H.; Monjazebe, R. Reclassification of Urinary Cytology Regarding The Paris System for Reporting Urinary Cytology with Cytohistological Correlation Demonstrates High Sensitivity for High-Grade Urothelial Carcinoma. *Diagn. Cytopathol.* **2020**, *48*, 446–452.
7. Kuan, K.C.; Segura, S.E.; Ahlstedt, J.; Khader, S.N.; Hakima, L. The Predictive Value of Positive and Suspicious Urine Cytology: Are They Different? *Diagn. Cytopathol.* **2020**. doi:10.1002/dc.24531.
8. de Paula, R.; Oliveira, A.; Nunes, W.; Bovolim, G.; Domingos, T.; De Brot, L.; Bezerra, S.; Cunha, I.; Morini, M.; Saieg, M. Two-Year Study on the Application of the Paris System for Urinary Cytology in a Cancer Centre. *Cytopathology* **2020**, *31*, 41–46.
9. Moulavasilis, N.; Lazaris, A.; Katafigiotis, I.; Stravodimos, K.; Constantinides, C.; Mikou, P. Risk of Malignancy Assessment for the Paris System for Reporting Urinary Cytology. *Diagn. Cytopathol.* **2020**. doi:10.1002/dc.24575.
10. Begam K, V.; Kota Reddy Vallamreddy, S.; Pratima, J. Implementation of the Paris System versus Institutional

Diagnosis in the Performance of Urinary Cytology: A 5 Years Correlative Study of 74 Cases. *IP Arch. Cytol.*

*Histopathol. Res.* **2019**, 4, 193–198.

11. Stanzione, N.; Ahmed, T.; Fung, P.C.; Cai, D.; Lu, D.Y.; Sumida, L.C.; Moatamed, N.A. The Continual Impact of the Paris System on Urine Cytology, a 3-Year Experience. *Cytopathology* **2019**, 31, 35–40.
12. Rai, S.; Lali, B.S.; Venkataramana, C.G.; Philipose, C.S.; Rao, R.; Prabhu, G.L. A Quest for Accuracy: Evaluation of The Paris System in Diagnosis of Urothelial Carcinomas. *J. Cytol.* **2019**, 36, 169–173.
13. Mikou, P.; Lenos, M.; Papaioannou, D.; Vrettou, K.; Trigka, E.-A.; Sousouris, S.; Constantinides, C. Evaluation of the Paris System in Atypical Urinary Cytology. *Cytopathology* **2018**, 29, 545–549.
14. Chan, E.; Balassanian, R.; Tabatabai, Z.L.; Lou, H.; Vohra, P. Improved Diagnostic Precision of Urine Cytology by Implementation of The Paris System and the Use of Cell Blocks. *Cancer Cytopathol.* **2018**, 126, 809–816.
15. Meilleroux, J.; Daniel, G.; Aziza, J.; d'Aure, D.M.; Quintyn-Ranty, M.-L.; Basset, C.M.L.; Evrard, S.M.; Courtade-Saidi, M.M. One Year of Experience Using the Paris System for Reporting Urinary Cytology. *Cancer Cytopathol.* **2018**, 126, 430–436.
16. Zare, S.; Mirsadraei, L.; Reisian, N.; Liao, X.; Roma, A.; Shabaik, A.; Hasteh, F. A Single Institutional Experience with the Paris System for Reporting Urinary Cytology: Correlation of Cytology and Histology in 194 Cases. *Am. J. Clin. Pathol.* **2018**, 150, 162–167.
17. Rohilla, M.; Singh, P.; Rajwanshi, A.; Gupta, N.; Srinivasan, R.; Dey, P.; Kakkar, N. Cytohistological Correlation of Urine Cytology in a Tertiary Centre with Application of the Paris System. *Cytopathology* **2018**, 29, 436–443.
18. Xing, J.; Monaco, S.E.; Pantanowitz, L. Utility of The Paris System for Reporting Urinary Cytology in Upper Urinary Tract Specimens. *J. Am. Soc. Cytopathol.* **2018**, 7, 311–317.
19. Roy, M.; Kaushal, S.; Jain, D.; Seth, A.; Iyer, V.K.; Mathur, S.R. An Institutional Experience with The Paris System: A Paradigm Shift from Ambiguous Terminology to More Objective Criteria for Reporting Urine Cytology. *Cytopathology* **2017**, 28, 509–515.
20. Zheng, X.; Si, Q.; Du, D.; Harshan, M.; Zhang, Z.; Haines, K., 3rd; Shi, W.; Chhieng, D.C. The Paris System for Urine Cytology in Upper Tract Urothelial Specimens: A Comparative Analysis with Biopsy and Surgical Resection. *Cytopathology* **2018**, 29, 184–188.
21. Malviya, K.; Fernandes, G.; Naik, L.; Kothari, K.; Agnihotri, M. Utility of the Paris System in Reporting Urine Cytology. *Acta Cytol.* **2017**, 61, 145–152.

22. Suh, J.; Go, H.; Sung, C.; Baek, S.; Hwang, H.; Jeong, S.; Cho, Y. Modification of The Paris System for Urinary Tract Washing Specimens Using Diagnostic Cytological Features. *Cytopathology* **2017**, *28*, 516–523.
23. Wang, Y.; Auger, M.; Kanber, Y.; Caglar, D.; Brimo, F. Implementing The Paris System for Reporting Urinary Cytology Results in a Decrease in the Rate of the “atypical” Category and an Increase in Its Prediction of Subsequent High-Grade Urothelial Carcinoma. *Cancer Cytopathol.* **2017**, *126*, 207–214.
24. Toyonaga, Y.; Yamazaki, K.; Koyama, Y.; Yamada, M.; Ishida, Y. A Modified Direct-Smear Processing Technique Employing Two-Step Centrifugation/Fixation Is Useful for Detecting High-Grade Urothelial Carcinoma. *Acta Cytol.* **2017**, *61*, 447–454.
25. Granados, R.; Duarte, J.A.; Corrales, T.; Camarmo, E.; Bajo, P. Applying the Paris System for Reporting Urine Cytology Increases the Rate of Atypical Urothelial Cells in Benign Cases: A Need for Patient Management Recommendations. *Acta Cytol.* **2016**, *61*, 71–76.
26. Hassan, M.; Solanki, S.; Kassouf, W.; Kanber, Y.; Caglar, D.; Auger, M.; Brimo, F. Impact of Implementing the Paris System for Reporting Urine Cytology in the Performance of Urine Cytology: A Correlative Study of 124 Cases. *Am. J. Clin. Pathol.* **2016**, *146*, 384–390.
27. Miki, Y.; Neat, M.; Chandra, A. Application of The Paris System to Atypical Urine Cytology Samples: Correlation with Histology and UroVysion (R) FISH. *Cytopathology* **2016**, *28*, 88–95.
28. Joudi, A.M.; Pambuccian, S.E.; Wojcik, E.M.; Barkan, G.A. The Positive Predictive Value of “Suspicious for High-Grade Urothelial Carcinoma” in Urinary Tract Cytology Specimens: A Single-Institution Study of 665 Cases. *Cancer Cytopathol.* **2016**, *124*, 811–819.
